# Supplementary material for: Trace N introduction accelerates desorption of intermediates for the HER and formation of MOOH species for the OER on NiCoP to boost overall water splitting
Source: Royal Society of Chemistry journal article supplement (doi:10.1039/d2ta06897d), 2022-12-06
Supplement: d2ta06897d1.pdf [file d2ta06897d1.pdf]

Trace N introduction accelerates desorption of intermediates for HER and  
formation of MOOH species for OER on NiCoP to boost overall water  
splitting

*Yujie Liu<sup>a</sup>, Zhi Li<sup>b</sup>, Haixiao Sun<sup>a</sup>, Longjiao Zheng<sup>a</sup>, Zhaoshuo Yuan<sup>a</sup>, Shuna Li<sup>a</sup>,  
Yunrui Li<sup>a</sup>, Xu Fang<sup>a</sup>, Yufeng Gao<sup>a</sup>, Zhen Wang<sup>a</sup>, Xiaoping Dai<sup>a</sup>, Xin Zhang<sup>a\*</sup> and  
Weiyu Song<sup>b\*</sup>*

<sup>a</sup>State Key Laboratory of Heavy Oil Processing

College of Chemical Engineering and Environment, China University of Petroleum  
Beijing, 102249, China.

<sup>b</sup>College of Science, China University of Petroleum

Beijing, 102249, China.

E-mail: zhangxin@cup.edu.cn, songwy@cup.edu.cn

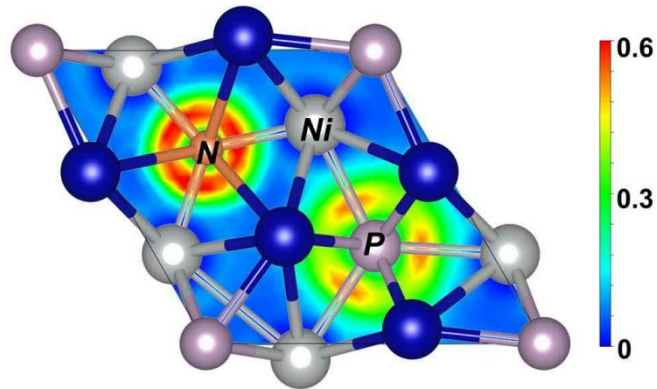

Fig. S1. 2D-ELF of N-NiCoP.

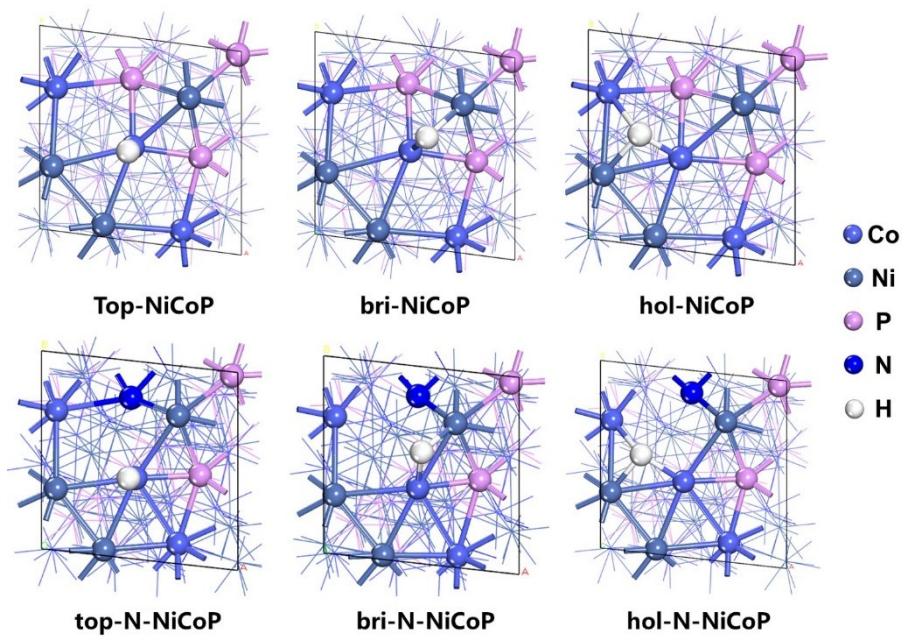

Fig. S2. The three positions (top, bridge, and hollow position) of the surface adsorption H models on NiCoP and N-NiCoP.

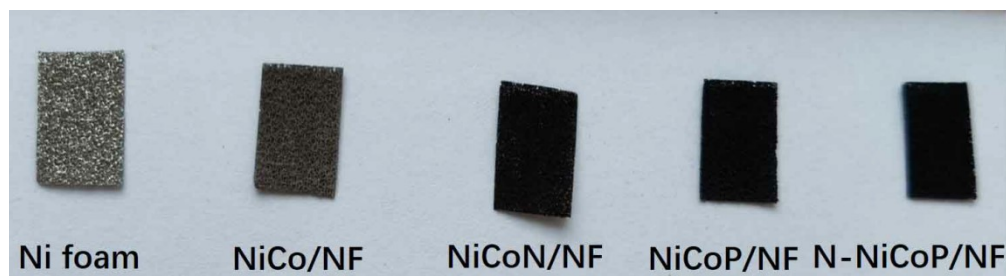

Fig. S3. Photo images of the different samples: bare clean Ni Foam, NiCo/NF, NiCoN/NF, NiCoP/NF and N-NiCoP/NF.

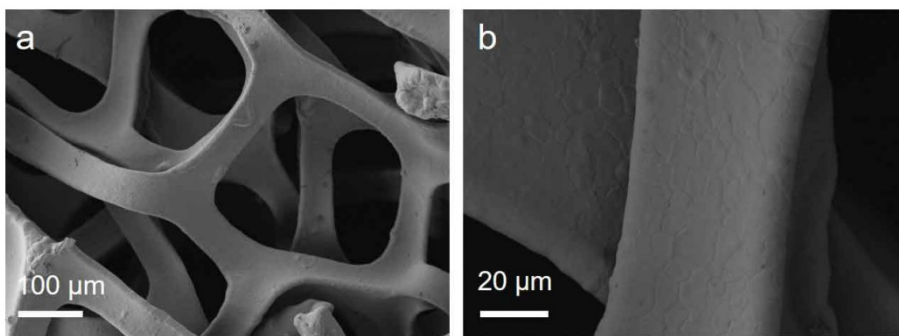

Fig. S4. SEM images of bare clean Ni Foam at different magnifications.

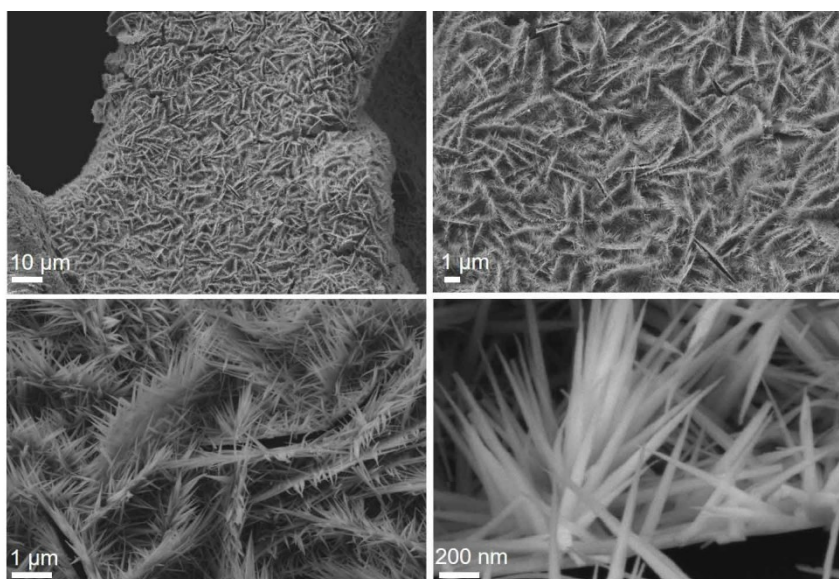

Fig. S5. SEM images of NiCo on Ni Foam at different magnifications.

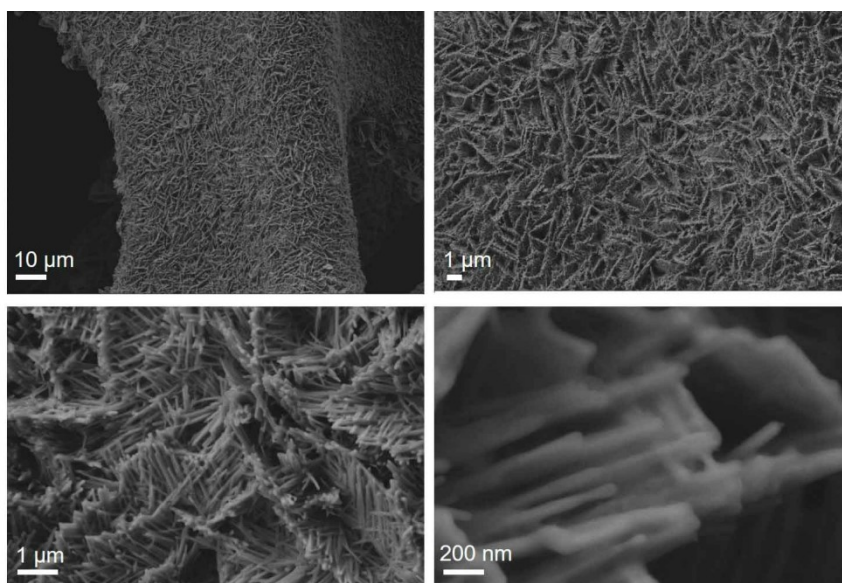

Fig. S6. SEM images of NiCoN on Ni Foam at different magnifications.

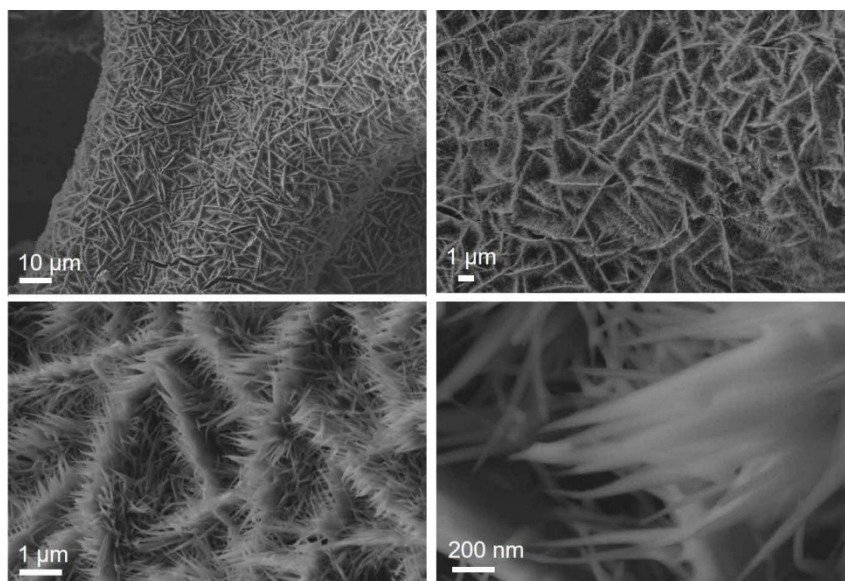

Fig. S7. SEM images of NiCoP on Ni Foam at different magnifications.

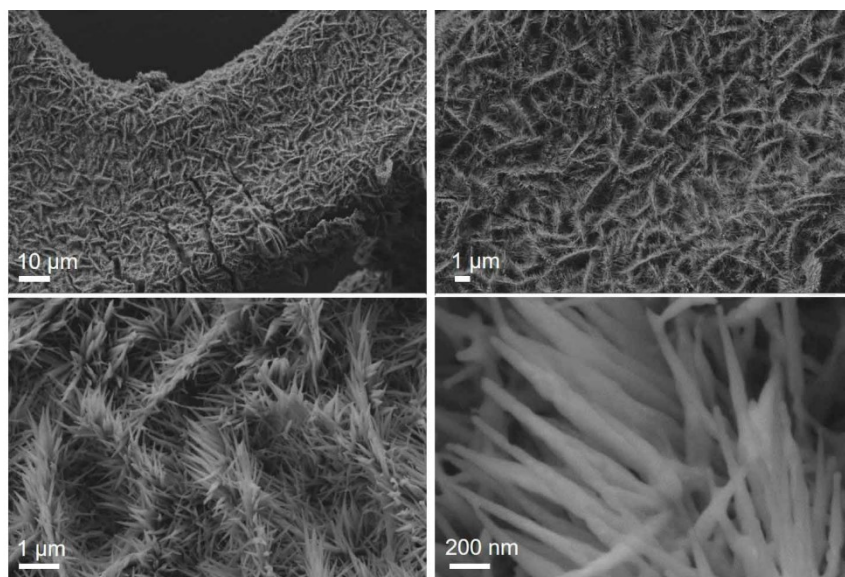

Fig. S8. SEM images of N-NiCoP on Ni Foam at different magnifications.



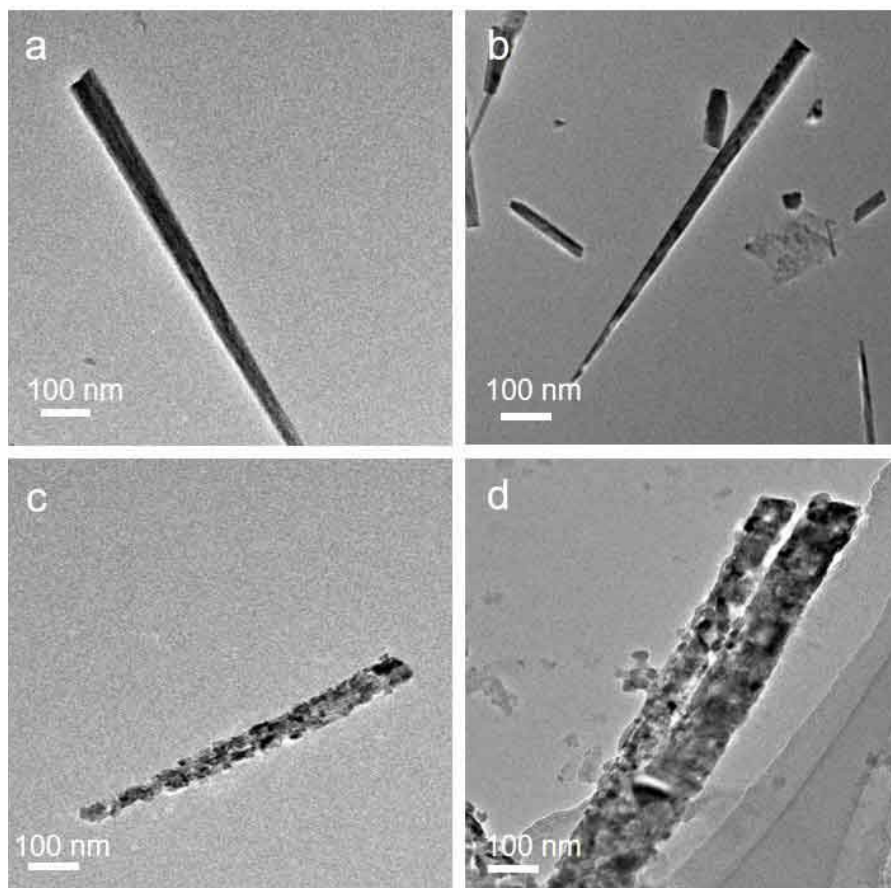

Fig. S9. TEM images of (a) NiCo, (b) NiCoP, (c) NiCoN and (d) N-NiCoP.

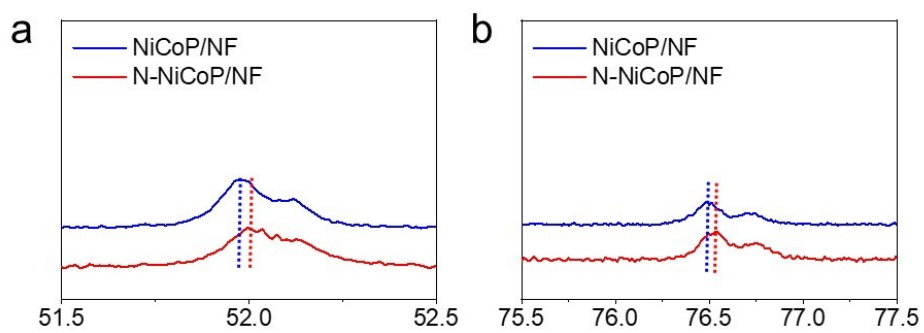

Fig. S10 Partial enlargement XRD patterns of NiCoP/NF and N-NiCoP/NF.

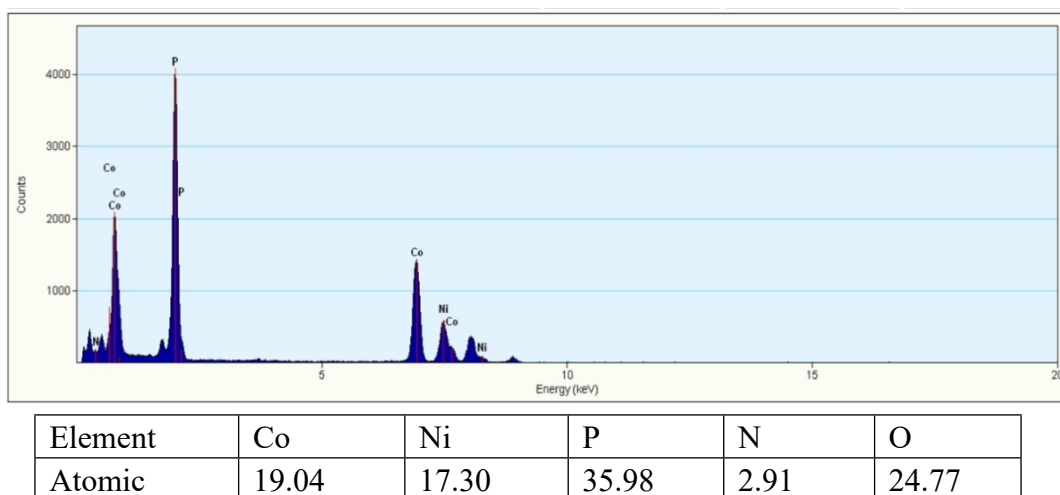

Fig. S11. TEM-EDS spectrum of N-NiCoP.

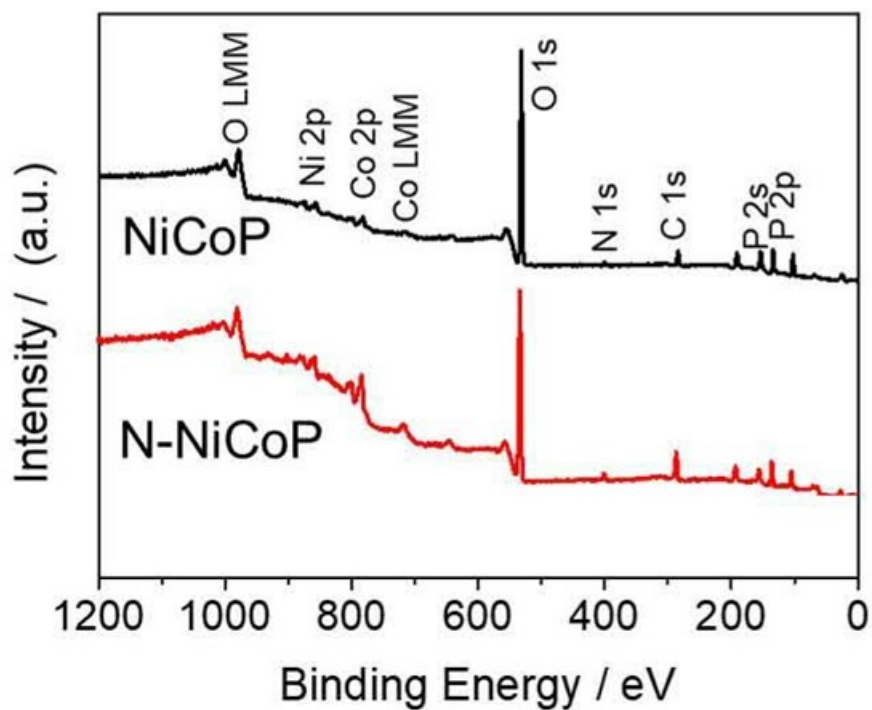

Fig. S12. High-resolution XPS spectrum of (a) full spectra in NiCoP and N-NiCoP samples

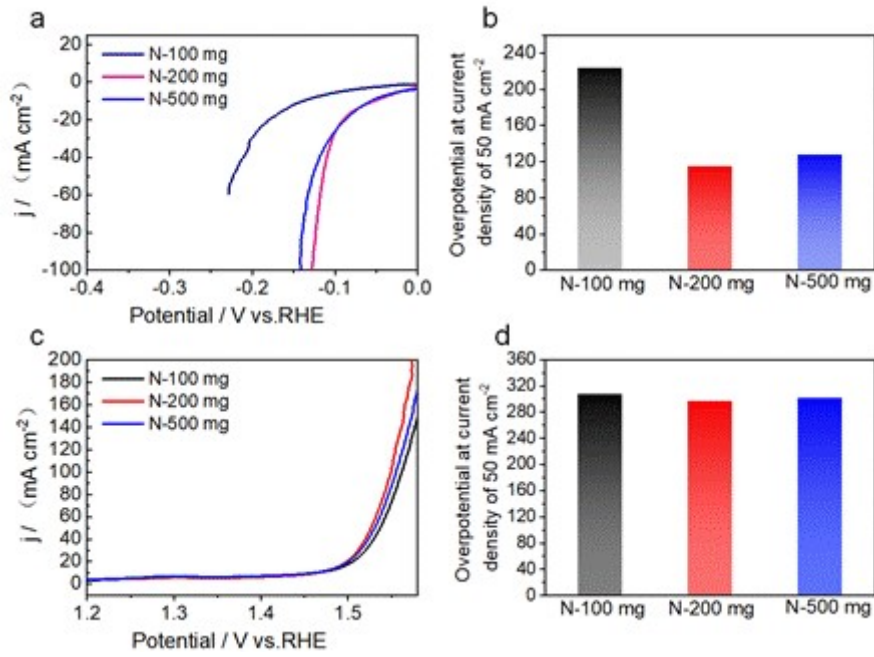

Fig. S13. Polarization curves of HER (a) and OER (b) in 1.0 M KOH with different contents of N samples, and Corresponding overpotential histogram in (c) and (d).

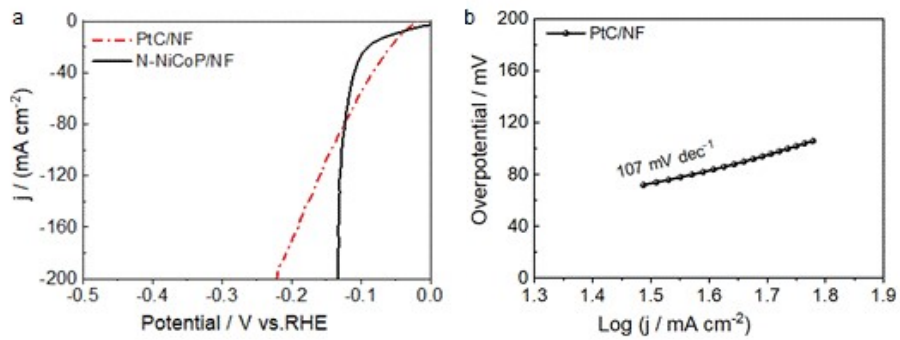

Fig. S14. (a) HER-LSV curves of PtC/NF and N-NiCoP/NF samples, (a) Tafel plot of PtC/NF.

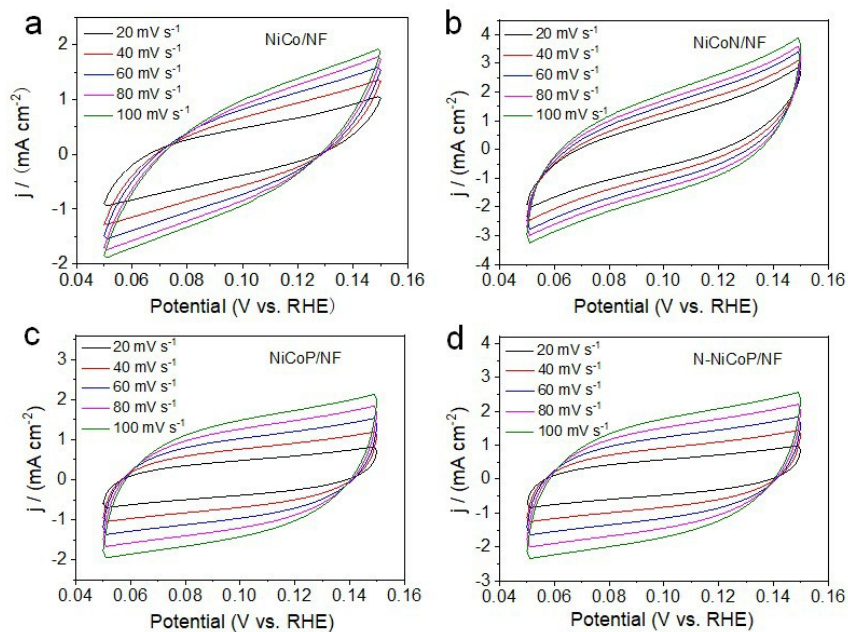

Fig. S15. (a) Cyclic voltammograms for (a) NiCo/NF, (b) NiCoN/NF, (c) NiCoP/NF and (d) N-NiCoP samples in the region of 0.05-0.15 V (vs RHE).

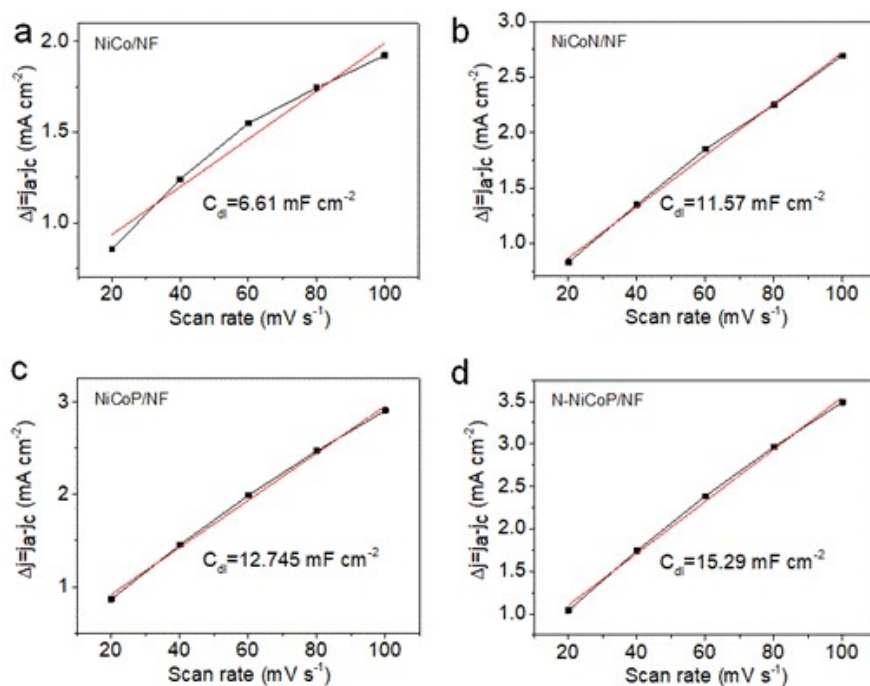

Fig. S16. Calculated  $C_{dl}$  for (a) NiCo/NF, (b) NiCoN/NF, (c) NiCoP/NF and (d) N-NiCoP samples.



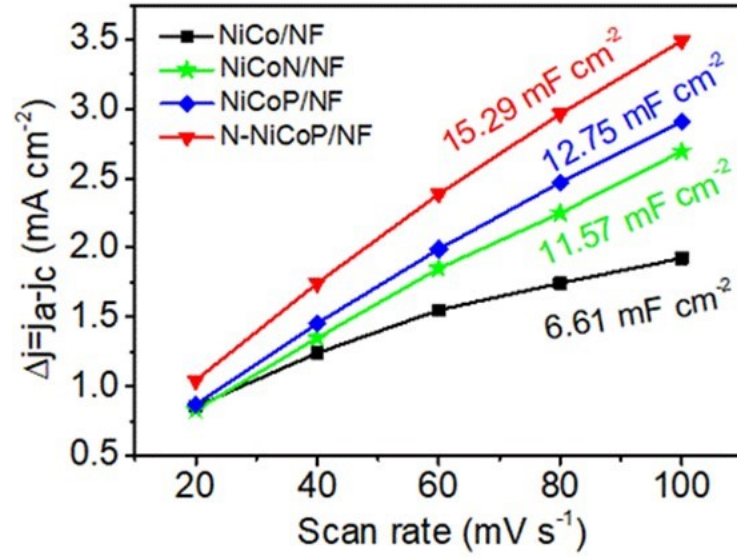

Fig. S17. The calculated  $C_{dl}$  of different samples.

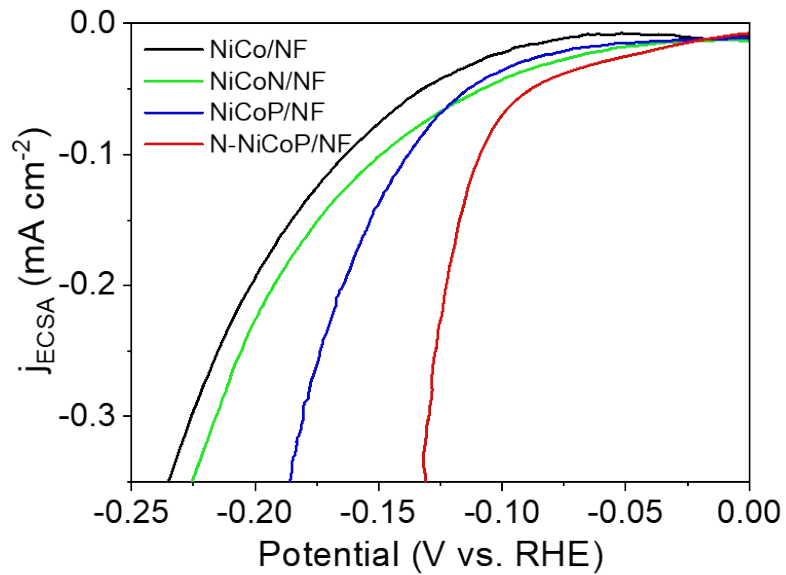

Fig. S18. The ECSA-normalized HER polarization curves.

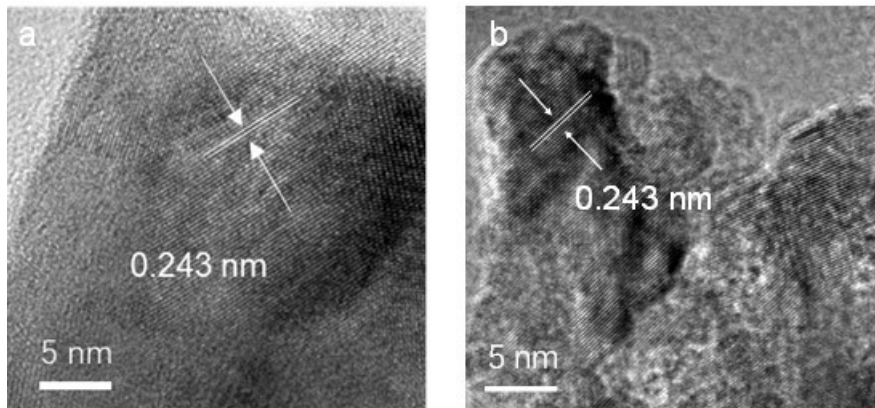

Fig. S19. HRTEM images of N-NiCoP/NF before and after 30 h HER process.

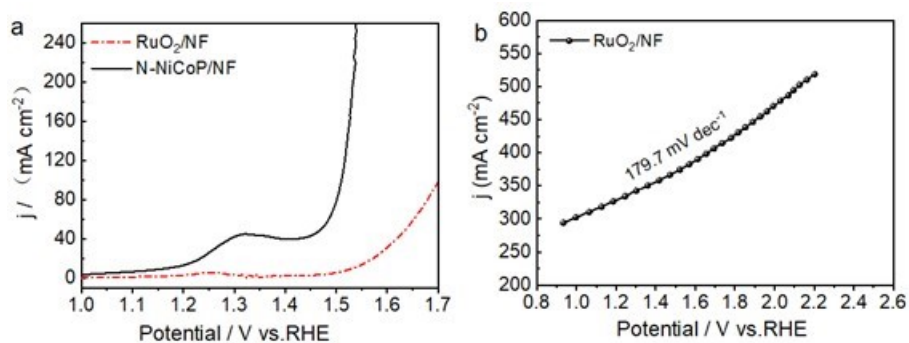

Fig. S20. (a) OER-LSV curves of RuO<sub>2</sub>/NF and N-NiCoP samples, (b) Tafel slope of RuO<sub>2</sub>/NF.

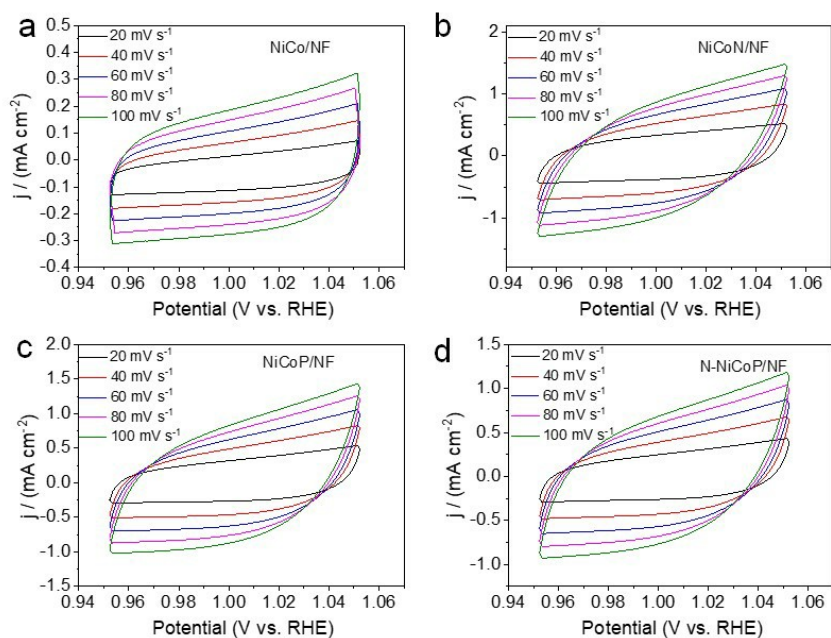

Fig. S21. (a) Cyclic voltammograms for (a) NiCo/NF, (b) NiCoN/NF, (c) NiCoP/NF and (d) N-NiCoP samples in the region of 0.05-0.15 V (vs RHE).

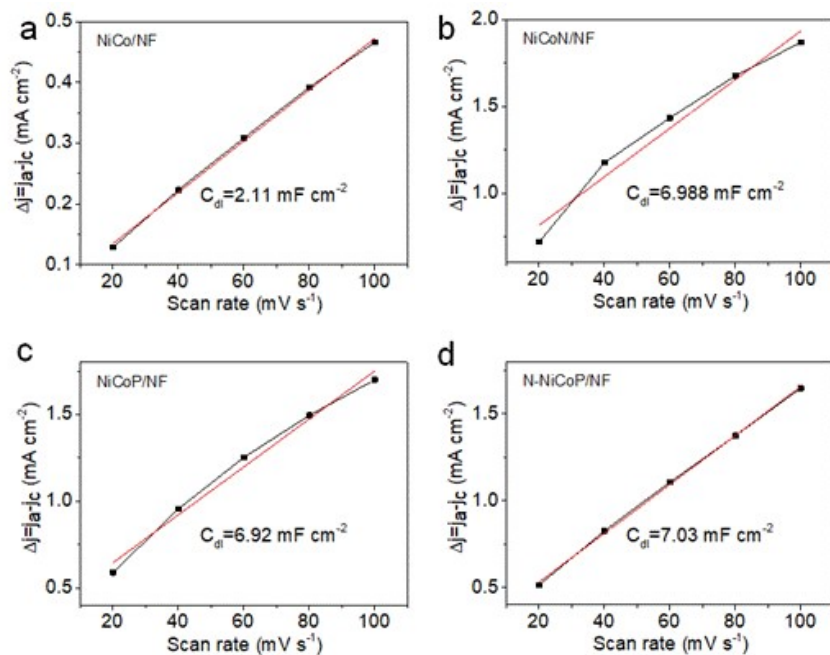

Fig. S22. Calculated  $C_{dl}$  for (a) NiCo/NF, (b) NiCoN/NF, (c) NiCoP/NF and (d) N-NiCoP samples.

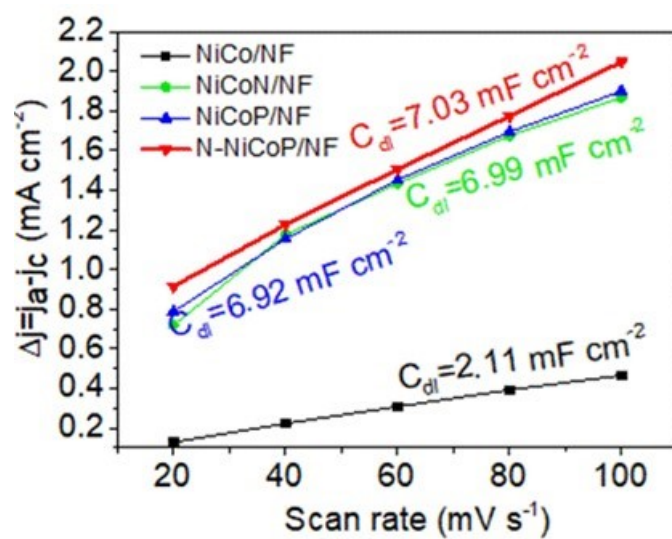

Fig. S23. The calculated  $C_{dl}$  of different samples.

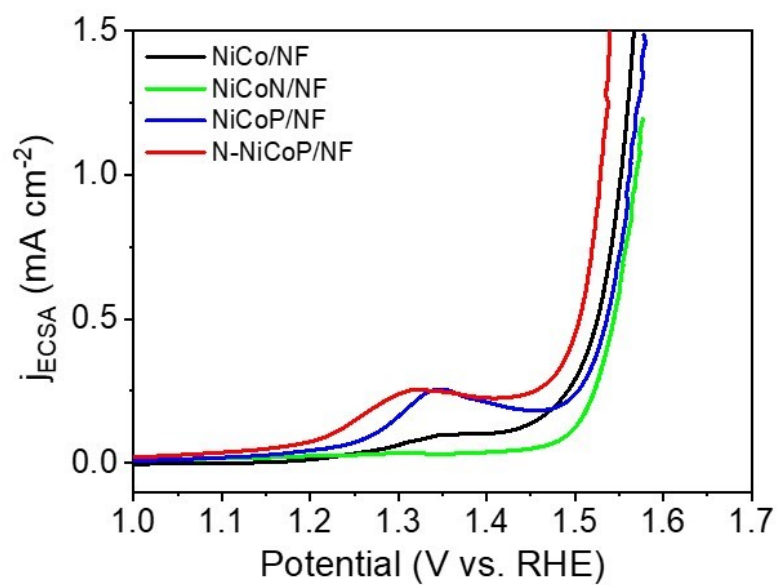

Fig. S24. The ECSA-normalized OER polarization curves.

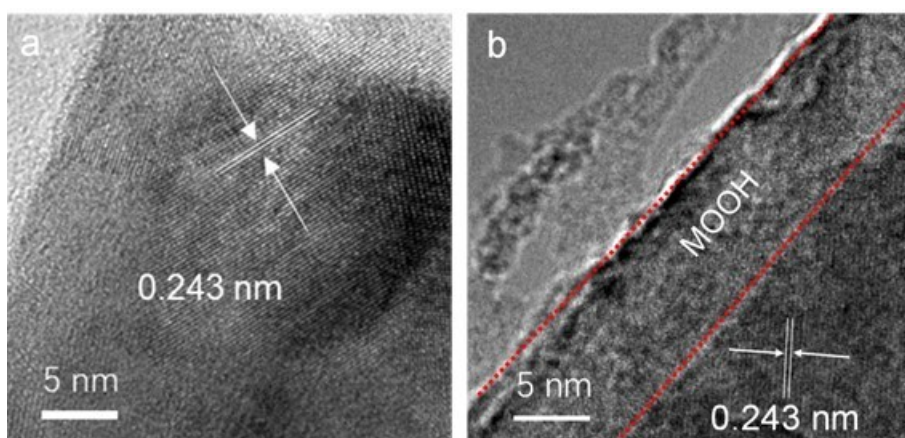

Fig. S25. HRTEM images of N-NiCoP/NF before and after 30 h OER process.



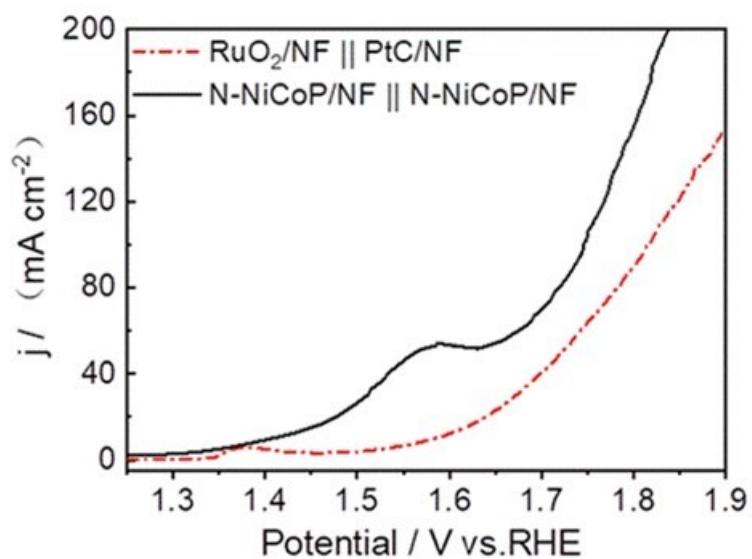

Fig. S26. Overall water splitting of LSV curves of RuO<sub>2</sub>/NF||PtC/NF and N-NiCoP/NF|| N-NiCoP/NF samples

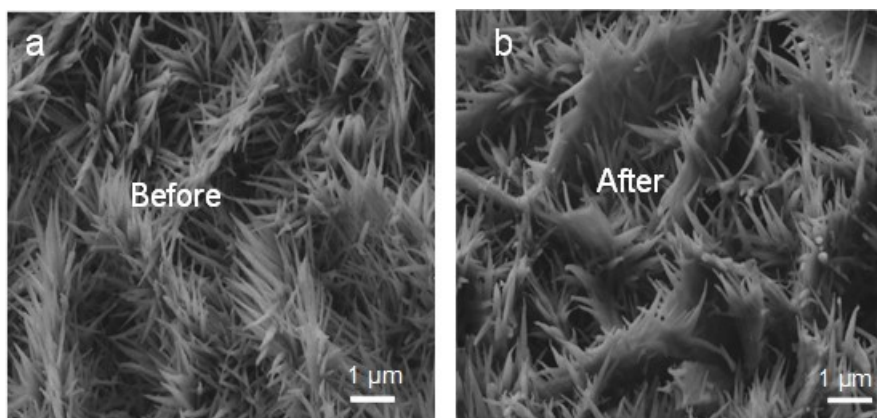

Fig. S27. SEM images of N-NiCoP on Ni Foam before and after 100 h overall water splitting in (a) and (b).

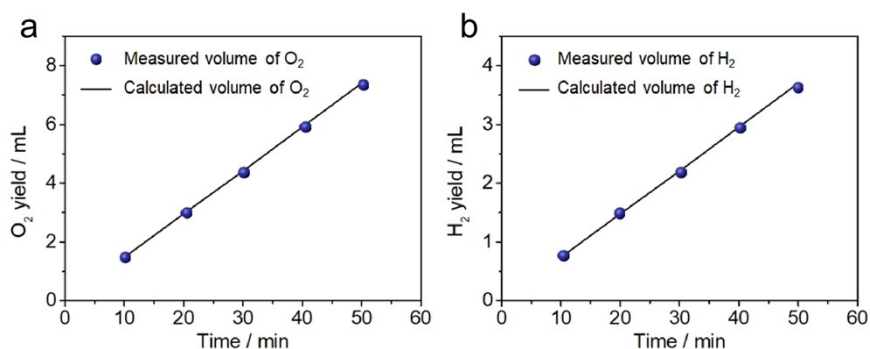

Fig. S28. (a) The volume of oxygen was theoretically calculated and actually measured for N-NiCoP/NF sample in 1.0 M KOH, (b) the Volume of hydrogen was theoretically calculated and measured simultaneously.

Table S1. Comparison of N-NiCoP HER performance with that of recently reported electrocatalysts.

| Catalyst                                   | $\eta_{10}$<br>/mV | $\eta_{50}$<br>/mV | Electrolyte                          | References |
|--------------------------------------------|--------------------|--------------------|--------------------------------------|------------|
| N-NiCoP/NF                                 | 53                 | 138                | 1.0 M KOH                            | This work  |
| O-NiCoP/Ni <sub>2</sub> P                  | 58                 | 119                | 1.0 M KOH                            | 1          |
| O-NiCoP                                    | 44                 | /                  | 1.0 M KOH                            | 2          |
| S-Ni <sub>5</sub> P <sub>4</sub>           | 56                 | 104                | 0.5 M H <sub>2</sub> SO <sub>4</sub> | 3          |
| CoP/NiCoP/NC                               | 75                 | /                  | 1.0 M KOH                            | 4          |
| NiCo foam                                  | 86                 | 135                | 1.0 M KOH                            | 5          |
| Ni <sub>3</sub> S <sub>2</sub> /Cu–NiCo/NF | 156                | 274                | 1.0 M KOH                            | 6          |
| Se-(NiCo)S <sub>x</sub> /(OH) <sub>x</sub> | 103                | 175                | 1.0 M KOH                            | 7          |
| CoNi-inf                                   | 72                 | 150                | 1.0 M KOH                            | 8          |
| MoS <sub>2</sub> /(CoNi@G)                 | 150                | 207                | 0.5 M H <sub>2</sub> SO <sub>4</sub> | 9          |

Table S2. Fitted values of equivalent circuit, R<sub>s</sub> and R<sub>ct</sub> in 1.0 M KOH for HER

|                    | NiCo/NF | NiCoN/NF | NiCoP/NF | N-NiCoP/NF |
|--------------------|---------|----------|----------|------------|
| R <sub>s</sub> /Ω  | 1.44    | 1.25     | 1.02     | 0.89       |
| R <sub>ct</sub> /Ω | 63.1    | 8.5      | 4.6      | 2.5        |

Table S3 Comparison of N-NiCoP OER performance with that of recently reported electrocatalysts.

| Catalyst | $\eta_{10}$<br>/mV | $\eta_{50}$<br>/mV | Electrolyte | References |
|----------|--------------------|--------------------|-------------|------------|
|----------|--------------------|--------------------|-------------|------------|

|                                                                                 |     |     |           |           |
|---------------------------------------------------------------------------------|-----|-----|-----------|-----------|
| N-NiCoP/NF                                                                      | /   | 250 | 1.0 M KOH | This work |
| NiFe foam                                                                       | 206 | 242 | 1.0 M KOH | 5         |
| SO <sub>4</sub> <sup>2-</sup> modified NiFe (oxy)hydroxide                      | /   | 234 | 1.0 M KOH | 10        |
| NiCo(OH) <sub>2</sub> /NiS <sub>2</sub> CHCs                                    | 258 | /   | 1.0 M KOH | 11        |
| NiCo@CuO                                                                        | 262 | /   | 1.0 M KOH | 12        |
| NiFe-OOH <sub>OV</sub>                                                          | /   | 330 | 1.0 M KOH | 13        |
| NiCoFeO <sub>x</sub>                                                            | 201 | /   | 1.0 M KOH | 14        |
| NiCo/Fe <sub>3</sub> O <sub>4</sub> /MOF-74                                     | 238 | 261 | 1.0 M KOH | 15        |
| NiCoSe <sub>2</sub> @NiO@CoNi <sub>2</sub> S <sub>4</sub> @CoS <sub>2</sub> /NF | /   | 350 | 1.0 M KOH | 16        |
| NiMoO <sub>4</sub> (Vo)                                                         | /   | 220 | 1.0 M KOH | 17        |

Table S4. Fitted values of equivalent circuit, R<sub>s</sub> and R<sub>ct</sub> in 1.0 M KOH for OER

|                    | NiCo/NF | NiCoN/NF | NiCoP/NF | N-NiCoP/NF |
|--------------------|---------|----------|----------|------------|
| R <sub>s</sub> /Ω  | 1.01    | 0.95     | 0.79     | 0.69       |
| R <sub>ct</sub> /Ω | 4.3     | 3.71     | 1.96     | 1.85       |

Table S5. Comparison of N-NiCoP OWS performance in 1.0 M KOH electrolyte with recently reported electrocatalysts.

| Catalyst               | E/mV                                                                     | Stability/h | References |
|------------------------|--------------------------------------------------------------------------|-------------|------------|
| N-NiCoP/NF  N-NiCoP/NF | J <sub>52</sub> =1.62<br>J <sub>100</sub> =1.74                          | 100         | This work  |
| CVN/CC  CVN/CC         | J <sub>10</sub> =1.64<br>J <sub>50</sub> =1.88<br>J <sub>100</sub> =2.12 | 100         | 18         |

|                                                                                                                                                                         |                                                                          |    |    |
|-------------------------------------------------------------------------------------------------------------------------------------------------------------------------|--------------------------------------------------------------------------|----|----|
| NiCoP  NiCoP                                                                                                                                                            | J <sub>10</sub> =1.53<br>J <sub>50</sub> =1.75<br>J <sub>100</sub> =1.86 | 20 | 19 |
| NiCo foam(-)  NiFe<br>foam(+)                                                                                                                                           | J <sub>50</sub> =1.59<br>J <sub>100</sub> =1.64                          | 50 | 5  |
| Ni <sub>3</sub> S <sub>2</sub> /Cu–<br>NiCo/NF  Ni <sub>3</sub> S <sub>2</sub> /Cu–NiCo/NF                                                                              | J <sub>50</sub> =1.70<br>J <sub>100</sub> =1.75                          | 12 | 6  |
| Co-Ni <sub>x</sub> P <sub>y</sub> @Co <sub>3</sub> O <sub>4</sub> /NF  Co-<br>Ni <sub>x</sub> P <sub>y</sub> @Co <sub>3</sub> O <sub>4</sub> /NF                        | J <sub>50</sub> =1.62                                                    | 36 | 20 |
| NiCoP  NiCoP                                                                                                                                                            | J <sub>50</sub> =1.72<br>J <sub>100</sub> =1.80                          | 24 | 21 |
| Mo–NiCoP  Mo–NiCoP                                                                                                                                                      | J <sub>10</sub> =1.61<br>J <sub>50</sub> =1.7                            | 48 | 22 |
| NiCoSe <sub>2</sub> @NiO@CoNi <sub>2</sub> S <sub>4</sub><br>@CoS <sub>2</sub> /NF  NiCoSe <sub>2</sub> @NiO@<br>CoNi <sub>2</sub> S <sub>4</sub> @CoS <sub>2</sub> /NF | J <sub>10</sub> =1.583<br>J <sub>50</sub> =1.952                         | 24 | 16 |
| Se-(NiCo)S <sub>x</sub> /(OH) <sub>x</sub>   Se-<br>(NiCo)S <sub>x</sub> /(OH) <sub>x</sub>                                                                             | J <sub>10</sub> =1.6<br>J <sub>50</sub> =1.84<br>J <sub>100</sub> =2.05  | 66 | 7  |
| CoNiMoO <sub>4</sub> /CuOx/CF  CoNi<br>MoO <sub>4</sub> /CuOx/CF                                                                                                        | J <sub>50</sub> =1.532                                                   | 20 | 23 |
| Al, Fe-CoP/RGO  Al, Fe-<br>CoP/RGO                                                                                                                                      | J <sub>10</sub> =1.66<br>J <sub>50</sub> =1.78                           | 15 | 24 |
| O-CoP  O-CoP                                                                                                                                                            | J <sub>10</sub> =1.6<br>J <sub>50</sub> =1.74                            | 18 | 25 |
| NF/NiCoMoO-<br>H <sub>2</sub>   NF/NiCoMoO-H <sub>2</sub>                                                                                                               | J <sub>50</sub> =1.6<br>J <sub>100</sub> =1.73                           | 60 | 26 |
| Co-Mo-P/CoNWS/NF  Co-<br>Mo-P/CoNWS/NF                                                                                                                                  | J <sub>50</sub> =1.71<br>J <sub>100</sub> =1.78                          | 35 | 27 |
| NiFeOH/CoS <sub>x</sub> /NF  NiFeOH<br>/CoS <sub>x</sub> /NF                                                                                                            | J <sub>50</sub> =1.71<br>J <sub>100</sub> =1.75                          | 24 | 28 |
| Ni <sub>3</sub> S <sub>2</sub> /VG@NiCo  Ni <sub>3</sub> S <sub>2</sub> /VG<br>@NiCo                                                                                    | J <sub>50</sub> =1.85<br>J <sub>100</sub> =1.95                          | 24 | 29 |



## References

1. Y. Wen, J. Qi, D. Zhao, J. Liu, P. Wei, X. Kang and X. Li, *Appl. Catal. B*, 2021, **293**, 120196.
2. C. Liu, G. Zhang, L. Yu, J. Qu and H. Liu, *Small*, 2018, **14**, e1800421.
3. J. Chang, K. Li, Z. Wu, J. Ge, C. Liu and W. Xing, *ACS Appl. Mater. Interfaces*, 2018, **10**, 26303-26311.
4. R. Boppella, J. Tan, W. Yang and J. Moon, *Adv. Func. Mater.*, 2018, **29**, 1807976.
5. J. Zhou, L. Yu, Q. Zhou, C. Huang, Y. Zhang, B. Yu and Y. Yu, *Appl. Catal. B*, 2021, **288**, 120002.
6. L. Jia, G. Du, D. Han, Y. Hao, W. Zhao, Y. Fan, Q. Su, S. Ding and B. Xu, *J. Mater. Chem. A*, 2021, **9**, 27639-27650.
7. C. Hu, L. Zhang, Z. J. Zhao, A. Li, X. Chang and J. Gong, *Adv. Mater.*, 2018, **30**, e1705538.
8. X. Tan, S. Geng, Y. Ji, Q. Shao, T. Zhu, P. Wang, Y. Li and X. Huang, *Adv. Mater.*, 2020, **32**, e2002857.
9. Y. Tu, J. Deng, C. Ma, L. Yu, X. Bao and D. Deng, *Nano Energy*, 2020, **72**, 104700.
10. H. Liao, T. Luo, P. Tan, K. Chen, L. Lu, Y. Liu, M. Liu and J. Pan, *Adv. Func. Mater.*, 2021, **31**, 2102772.
11. J. Wang, A. Yang, J. Li, K. Su, Y. Tang and X. Qiu, *Appl. Catal. B*, 2022, **300**, 120727.
12. B. Chen, Z. Zhang, S. Kim, M. Baek, D. Kim and K. Yong, *Appl. Catal. B*, 2019, **259**, 118017.
13. Z. Ahmed, Krishankant, R. Rai, R. Kumar, T. Maruyama, C. Bera and V. Bagchi, *ACS Appl. Mater. Interfaces*, 2021, **13**, 55281-55291.
14. Y. Liu, Y. Ying, L. Fei, Y. Liu, Q. Hu, G. Zhang, S. Pang, W. Lu, C. Mak, X. Luo, L. Zhou, M. Wei and H. Huang, *J. Am. Chem. Soc.*, 2019, **141**, 8136-8145.
15. X. Wang, H. Xiao, A. Li, Z. Li, S. Liu, Q. Zhang, Y. Gong, L. Zheng, Y. Zhu, C. Chen, D. Wang, Q. Peng, L. Gu, X. Han, J. Li and D. Li, *J. Am. Chem. Soc.*, 2018, **140**, 15336-15341.
16. Z. Xu, H. Pan, Y. Lin, Z. Yang, J. Wang and Y. Gong, *J. Mater. Chem. A*, 2018, **6**, 18641-18648.
17. A. Karmakar, K. Karthick, S. S. Sankar, S. Kumaravel, M. Ragunath and S. Kundu, *J. Mater. Chem. A*, 2021, **9**, 11691-11704.
18. S. Dutta, A. Indra, Y. Feng, H. Han and T. Song, *Appl. Catal. B*, 2019, **241**, 521-527.
19. X. Lv, X. Li, C. Yang, X. Ding, Y. Zhang, Y. Z. Zheng, S. Li, X. Sun and X. Tao, *Adv. Func. Mater.*, 2020, **30**, 1910830.
20. B. Lu, J. Zang, W. Li, J. Li, Q. Zou, Y. Zhou and Y. Wang, *Chem. Eng. J.*, 2021, **422**, 130062.
21. L. Chen, Y. Song, Y. Liu, L. Xu, J. Qin, Y. Lei and Y. Tang, *J. Energy Chem.*, 2020, **50**, 395-401.
22. J. Lin, Y. Yan, C. Li, X. Si, H. Wang, J. Qi, J. Cao, Z. Zhong, W. Fei and J. Feng, *Nano-Micro Lett.*, 2019, 11:55.
23. M. Gu, X. Deng, M. Lin, H. Wang, A. Gao, X. Huang and X. Zhang, *Adv. Energy Mater.*, 2021, **11**, 2102361.
24. S. F. Zai, Y. T. Zhou, C. C. Yang and Q. Jiang, *Chem. Eng. J.*, 2021, **421**, 127856.
25. G. Zhou, M. Li, Y. Li, H. Dong, D. Sun, X. Liu, L. Xu, Z. Tian and Y. Tang, *Adv. Funct. Mater.*, 2019, **30**, 1905252.

26. S. Wen, T. Yang, N. Zhao, L. Ma and E. Liu, *Appl. Catal. B*, 2019, **258**, 117953.
27. V. H. Hoa, D. T. Tran, D. C. Nguyen, D. H. Kim, N. H. Kim and J. H. Lee, *Adv. Funct. Mater.*, 2020, **30**, 2002533.
28. R. Bose, V. R. Jothi, K. Karuppasamy, A. Alfantazi and S. C. Yi, *J. Mater. Chem. A*, 2020, **8**, 13795-13805.
29. X. Zhang, J. Fan, X. Lu, Z. Han, C. Cazorla, L. Hu, T. Wu and D. Chu, *Chem. Eng. J.*, 2021, **415**, 129048.
